# Supplementary material for: A thieno[3,4-f]isoindole-5,7-dione based copolymer for polymer solar cells
Source: Royal Society of Chemistry journal article supplement (doi:10.1039/c2py20674a), 2012-09-13
Supplement: c2py20674a.pdf [file c2py20674a.pdf]

## Supporting Information

### **A thieno[3,4-*f*]isoindole-5,7-dione based copolymer for polymer solar cells**

*Yue Wu, Yan Jing, Xia Guo, Shaoqing Zhang, Maojie Zhang\*, Lijun Huo\*, Jianhui Hou\**

State Key Laboratory of Polymer Physics and Chemistry, Beijing National Laboratory  
for Molecular Sciences Institute of Chemistry, Chinese Academy of Sciences, Beijing  
100190, China.

\* Corresponding authors.  
E-mail: [hjhzlz@iccas.ac.cn](mailto:hjhzlz@iccas.ac.cn)

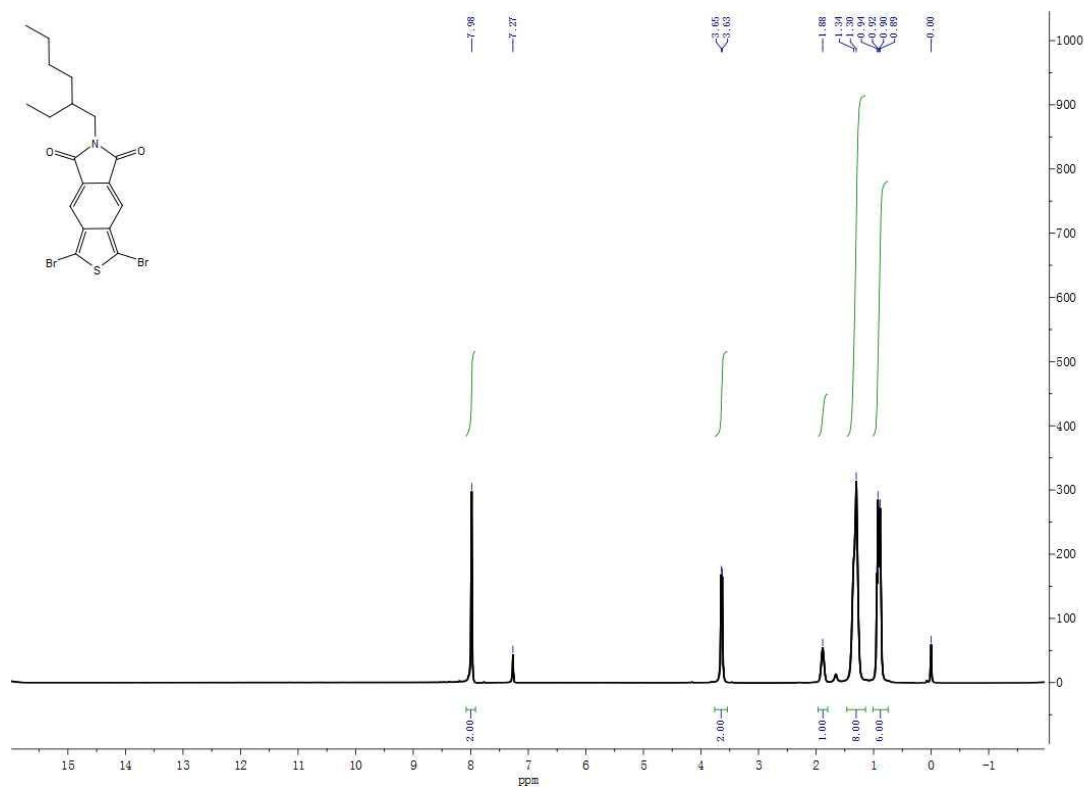

Figure. S1 <sup>1</sup>H spectra of Compound (2)

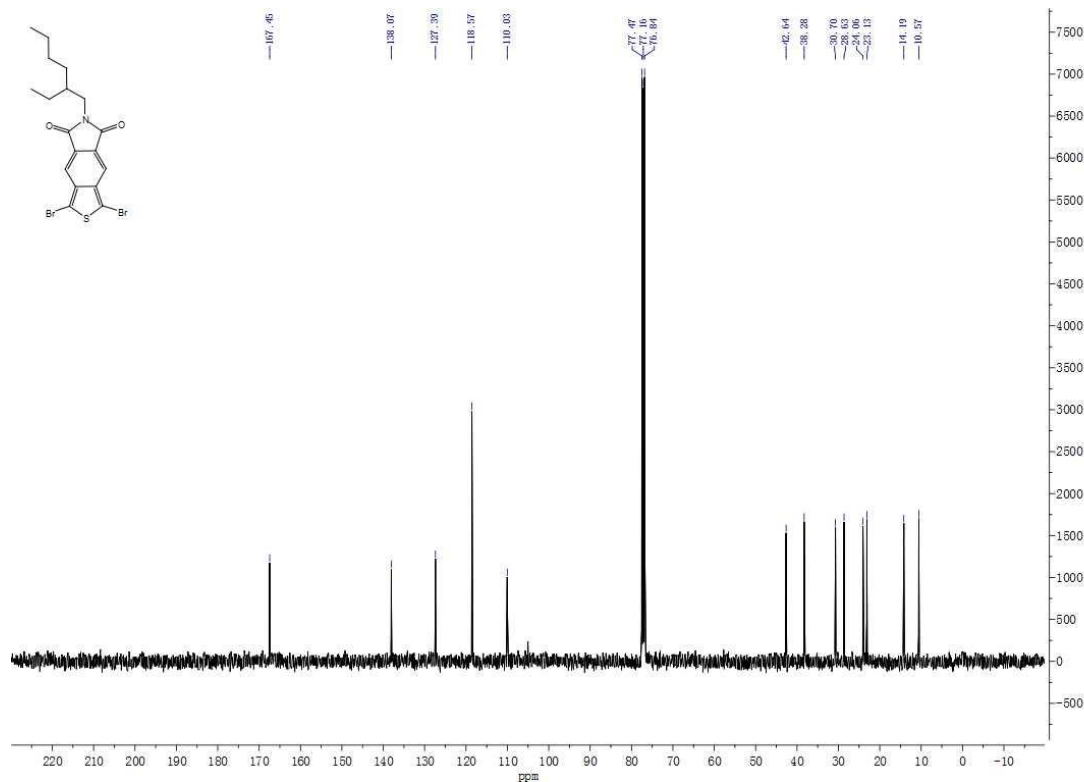

Figure. S2 <sup>13</sup>C spectra of Compound (2)

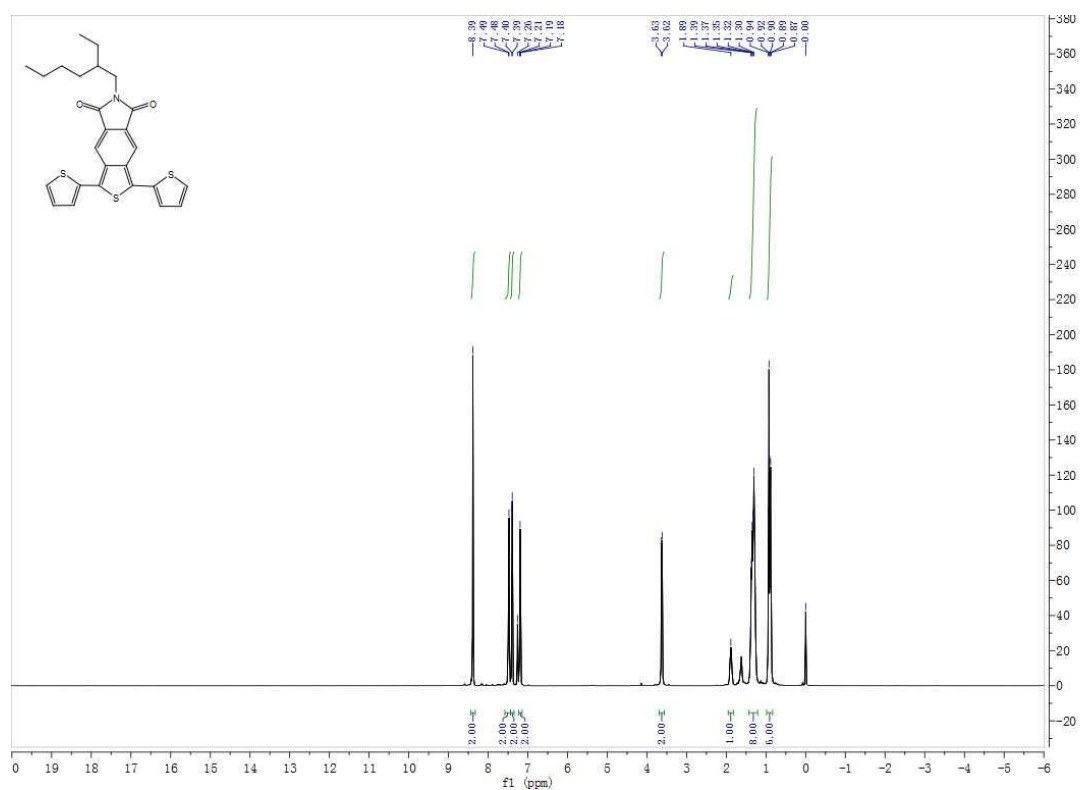

Figure. S3 <sup>1</sup>H spectra of Compound (3)

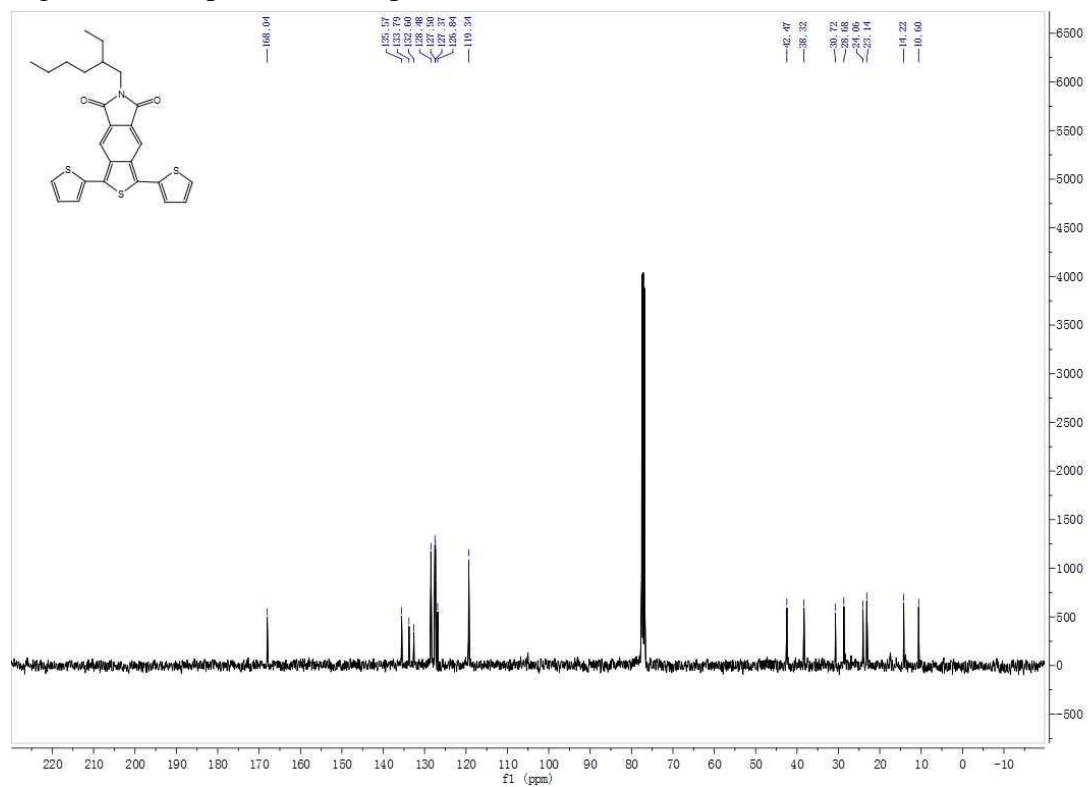

Figure. S4 <sup>13</sup>C spectra of Compound (3)

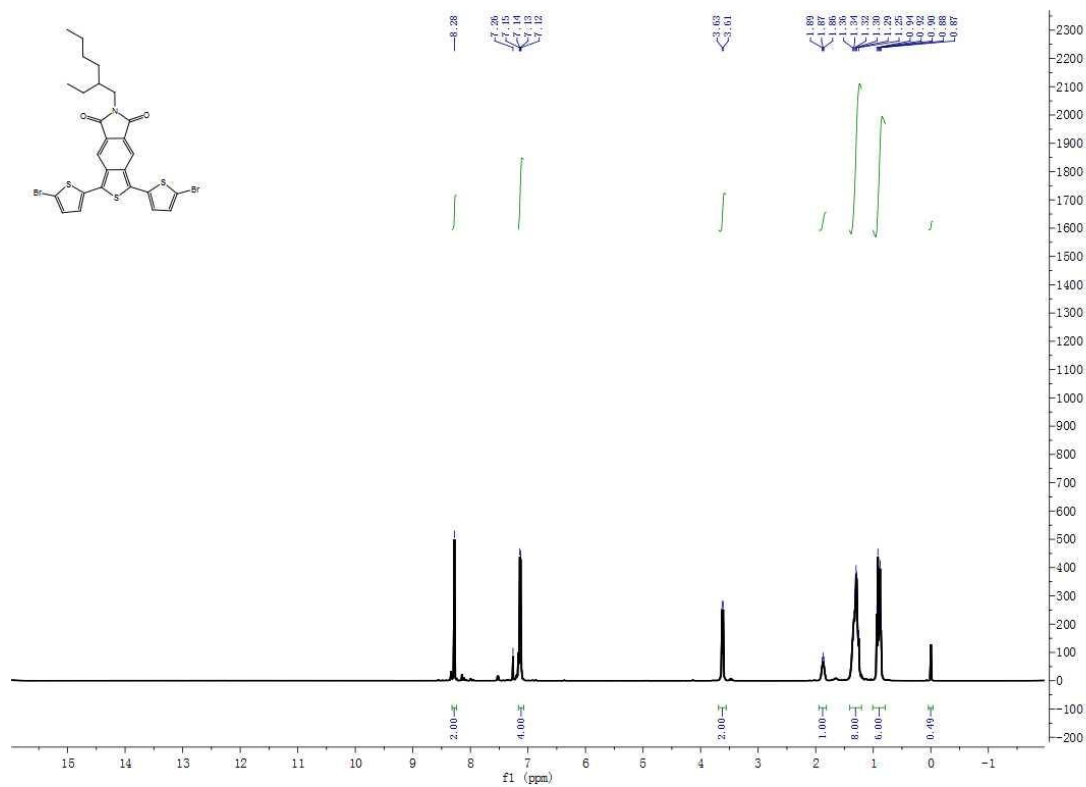

Figure. S5 <sup>1</sup>H spectra of Compound (4)

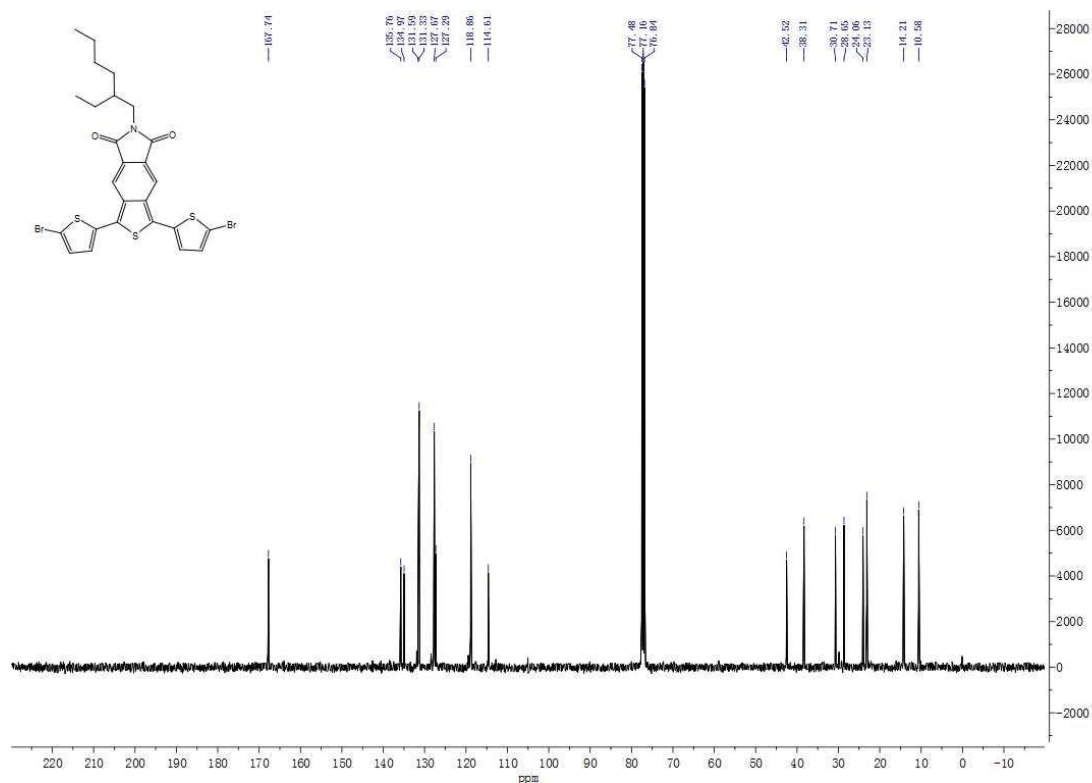

Figure. S6 <sup>13</sup>C spectra of Compound (4)

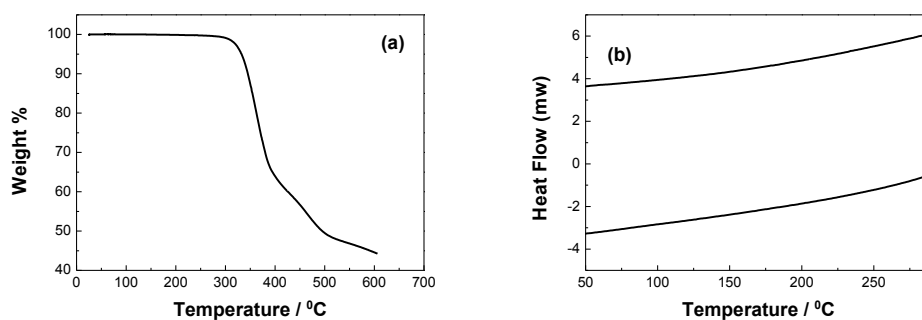

Figure. S7 (a) TGA plot of PBDTTID with a heating rate of 10 °C/min under the protection of nitrogen and (b) DSC thermograms of PBDTTID under the protection of nitrogen. (heating and cooling rate: 10 °C/min)

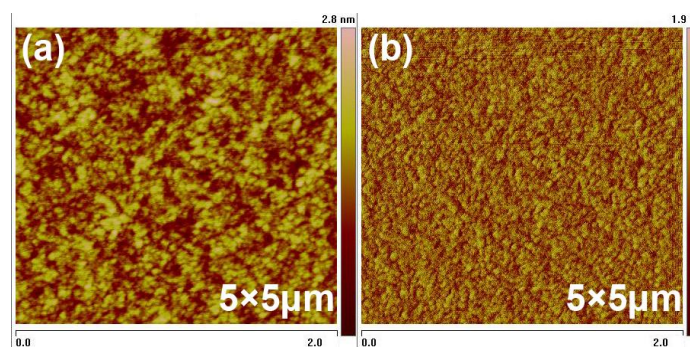

Fig. S8 Tapping mode AFM topography (a) and phase (b) images of pure polymer film.
